# Supplementary material for: Corneal topometric, aberrometric and biomechanical parameters in mucopolysaccharidosis patients
Source: PLoS One. 2019 Jun 27;14(6):e0218108. doi: 10.1371/journal.pone.0218108 (PMC6597047; doi:10.1371/journal.pone.0218108)
Supplement: S3 Fig — (XLSX) [file pone.0218108.s003.xlsx]

## Sheet: Joanna_MPS_random_eye_final
MPS_Gesund	Study_ID	include	ExamEye	ExamType	RfFmm	RsFmm	RhFmm	RvFmm	K1FD	K2FD	RmFmm	KmFD	AxisFflat	AstigFD	RPerFmm	RMinmm	Num.Ecc.F	Asph.QF	RfBmm	RsBmm	RhBmm	RvBmm	K1BD	K2BD	RmBmm	KmBmm	AxisBflat	AstigBD	RPerBmm	RMinBmm	Num.Ecc.B	Asph.QB	Ecc.Zone	PachyApex	PachyPupil	PupilPosX	PupilPosY	PachyMin	PachyMinPosX	PachyMinPosY	C.VolD3mm	C.VolD5mm	C.VolD7mm	C.VolD10mm	ISV	IVA	KI	CKI	IHA
Healthy	1	1	Links	(25)3D-ScanHR	8.36	8.24	8.36	8.24	40.4	40.9	8.3	40.7	12.8	0.6	8.58	7.99	0.5	-0.27	7.02	6.43	7.02	6.43	-5.7	-6.2	6.73	-5.9	3.1	0.5	7.17	6.09	0.49	-0.25	Zone8mm(Durchmesser)	525	526	0.14	0.52	525	0.07	0.13	3.8	11.1	23.9	57.5	18	0.2	1.01	1	4.4
Healthy	6	1	Links	(25)3D-ScanHR	7.68	7.45	7.68	7.45	44	45.3	7.56	44.6	175.1	1.3	7.74	7.37	0.47	-0.26	6.5	6.13	6.5	6.13	-6.1	-6.5	6.32	-6.3	174.1	0.4	6.7	6	0.36	-0.25	Zone8mm(Durchmesser)	521	521	0.02	0.04	518	0.14	-0.62	3.8	11	23.6	57.1	18	0.14	1.03	1.01	4.4
Healthy	7	1	Links	(25)3D-ScanHR	8.08	7.68	8.08	7.68	41.8	43.9	7.88	42.8	174.5	2.1	8.01	7.46	0.42	-0.21	6.67	6.21	6.67	6.21	-6	-6.4	6.44	-6.2	179.2	0.4	6.97	5.95	0.64	-0.43	Zone8mm(Durchmesser)	498	496	0.13	-0.12	494	0.5	-0.5	3.6	10.6	22.8	54.6	25	0.28	0.98	1	3.7
Healthy	14	1	Rechts	(25)3D-ScanHR	7.62	7.49	7.62	7.49	44.3	45.1	7.55	44.7	14.1	0.8	7.67	7.33	0.29	-0.1	6.39	5.96	6.39	5.96	-6.3	-6.7	6.17	-6.5	9.1	0.5	6.29	5.75	0.26	-0.07	Zone8mm(Durchmesser)	573	573	0.02	0.02	570	-0.68	0	4.1	12.2	26.2	65	12	0.1	1.01	0.99	4.5
Healthy	16	1	Links	(25)3D-ScanHR	7.36	7.28	7.36	7.28	45.9	46.3	7.32	46.1	178.5	0.5	7.46	7.16	0.43	-0.2	6.09	5.92	6.09	5.92	-6.6	-6.8	6.01	-6.7	12.1	0.2	6.34	5.72	0.42	-0.19	Zone8mm(Durchmesser)	525	526	-0.07	0.13	523	0	-0.42	3.8	11.2	24.3	60.4	12	0.12	1.01	1.01	2.9
Healthy	17	1	Rechts	(25)3D-ScanHR	7.44	7.26	7.44	7.26	45.3	46.5	7.35	45.9	178	1.2	7.56	7.15	0.3	-0.16	6.3	5.86	6.3	5.86	-6.3	-6.8	6.08	-6.6	1.5	0.5	6.08	5.71	-0.27	0.11	Zone8mm(Durchmesser)	538	536	-0.27	-0.05	535	-0.84	-0.14	3.9	11.4	24.9	64.3	14	0.09	1.03	1	5
Healthy	18	1	Rechts	(25)3D-ScanHR	8	7.92	7.92	8	42.2	42.6	7.96	42.4	64.5	0.4	8.05	7.76	0.28	-0.08	6.75	6.44	6.75	6.44	-5.9	-6.2	6.59	-6.1	1.9	0.3	6.91	6.37	0.49	-0.25	Zone8mm(Durchmesser)	551	552	-0.06	0.13	549	-0.66	-0.15	4	11.6	24.7	58.9	9	0.09	1	1	2.2
Healthy	19	1	Rechts	(25)3D-ScanHR	7.88	7.69	7.88	7.69	42.9	43.9	7.78	43.4	18.9	1	7.97	7.59	0.47	-0.24	6.63	6.34	6.63	6.34	-6	-6.3	6.48	-6.2	5.3	0.3	7.01	6.19	0.56	-0.35	Zone8mm(Durchmesser)	523	523	-0.09	-0.03	521	-0.65	0	3.8	11	23.6	55.8	13	0.1	1.03	1.01	2.7
Healthy	21	1	Rechts	(25)3D-ScanHR	7.53	7.35	7.35	7.53	44.8	45.9	7.44	45.4	53.1	1.1	7.52	7.24	0.13	-0.04	6.34	5.9	6.34	5.9	-6.3	-6.8	6.12	-6.5	12.9	0.5	6.12	5.72	-0.03	0.02	Zone8mm(Durchmesser)	592	590	-0.25	0.21	586	-0.96	0.07	4.3	12.5	27	67.4	14	0.12	1.02	0.99	1.6
Healthy	22	1	Rechts	(25)3D-ScanHR	7.71	7.52	7.52	7.71	43.8	44.9	7.62	44.3	72.6	1.1	7.82	7.43	0.45	-0.21	6.21	6.14	6.21	6.14	-6.4	-6.5	6.18	-6.5	36.6	0.1	6.31	5.68	-0.07	0	Zone8mm(Durchmesser)	577	576	-0.13	-0.11	574	-1.01	-0.08	4.2	12.2	26.6	66.9	13	0.11	1.03	1.01	1.2
Healthy	24	1	Links	(25)3D-ScanHR	8.18	8.01	8.18	8.01	41.3	42.1	8.09	41.7	176.6	0.9	8.4	7.94	0.51	-0.33	6.74	6.33	6.74	6.33	-5.9	-6.3	6.54	-6.1	2.3	0.4	7.04	6.07	0.45	-0.39	Zone8mm(Durchmesser)	594	592	0.38	0.07	591	0.67	-0.22	4.3	12.5	26.8	64.3	21	0.2	1.04	1.01	0.1
Healthy	25	1	Links	(25)3D-ScanHR	7.86	7.68	7.86	7.68	43	43.9	7.77	43.4	10.5	1	7.93	7.49	0.37	-0.23	6.71	6.19	6.71	6.19	-6	-6.5	6.45	-6.2	169	0.5	6.54	6.12	0.12	-0.04	Zone8mm(Durchmesser)	547	547	0.28	-0.03	546	0.42	-0.42	3.9	11.5	24.7	60.7	23	0.27	1.05	1.01	9.7
Healthy	26	1	Links	(25)3D-ScanHR	7.91	7.79	7.91	7.79	42.7	43.3	7.85	43	6.9	0.7	7.99	7.69	0.43	-0.2	6.81	6.33	6.81	6.33	-5.9	-6.3	6.57	-6.1	1.4	0.4	6.67	6.17	0.24	-0.12	Zone8mm(Durchmesser)	492	490	0.39	-0.08	487	0.36	-0.65	3.6	10.4	22.4	55.3	13	0.15	1.02	1.01	0.4
Healthy	28	1	Rechts	(25)3D-ScanHR	7.95	7.73	7.95	7.73	42.5	43.7	7.84	43.1	19.7	1.2	8.03	7.66	0.42	-0.2	6.82	6.3	6.82	6.3	-5.9	-6.3	6.56	-6.1	13.4	0.5	6.76	6.19	0.34	-0.15	Zone8mm(Durchmesser)	509	507	-0.28	-0.12	505	-0.97	-0.22	3.7	10.7	23	56	14	0.11	1.03	1	2
Healthy	29	1	Rechts	(25)3D-ScanHR	7.71	7.49	7.71	7.49	43.8	45.1	7.6	44.4	5	1.3	7.91	7.43	0.58	-0.35	6.61	6.1	6.61	6.1	-6.1	-6.6	6.35	-6.3	176.2	0.5	6.67	5.98	0.47	-0.23	Zone8mm(Durchmesser)	500	499	-0.15	-0.04	497	-0.73	0.07	3.6	10.6	22.7	55.6	20	0.14	1.08	1.01	5.8
Healthy	30	1	Links	(25)3D-ScanHR	8.34	8.15	8.34	8.15	40.4	41.4	8.24	40.9	6.3	1	8.44	8.03	0.38	-0.16	6.95	6.47	6.95	6.47	-5.8	-6.2	6.71	-6	169.3	0.4	6.88	6.37	0.04	-0.03	Zone8mm(Durchmesser)	589	587	0.16	-0.07	585	0.44	-0.51	4.2	12.4	26.4	63.9	15	0.14	1.01	1	3.3
Healthy	31	1	Links	(25)3D-ScanHR	7.88	7.62	7.62	7.88	42.9	44.3	7.75	43.6	87.7	1.4	7.91	7.56	0.32	-0.19	6.37	6.31	6.31	6.37	-6.3	-6.3	6.34	-6.3	123.7	0.1	6.52	6.03	0.26	-0.13	Zone8mm(Durchmesser)	538	538	-0.01	-0.08	536	0.34	-0.34	3.9	11.4	24.6	60.9	17	0.16	1.03	1	2.3
Healthy	32	1	Rechts	(25)3D-ScanHR	7.9	7.79	7.9	7.79	42.7	43.3	7.85	43	179	0.6	7.98	7.71	0.3	-0.16	6.52	6.27	6.52	6.27	-6.1	-6.4	6.39	-6.3	172.1	0.2	6.62	6.09	0.04	-0.03	Zone8mm(Durchmesser)	559	557	-0.18	0.2	554	-0.87	0	4	11.9	25.6	63.1	11	0.1	1.01	1	1.6
Healthy	33	1	Links	(25)3D-ScanHR	7.64	7.23	7.64	7.23	44.1	46.7	7.44	45.4	1.1	2.5	7.72	7.17	0.43	-0.32	6.2	5.75	6.2	5.75	-6.5	-7	5.97	-6.7	6.9	0.5	6.4	5.58	0.44	-0.23	Zone8mm(Durchmesser)	531	531	0.06	0.04	528	0.07	-0.54	3.9	11.4	25.1	63.3	25	0.16	1	1.01	1.6
Healthy	34	1	Rechts	(25)3D-ScanHR	7.36	7.3	7.36	7.3	45.9	46.2	7.33	46	33.3	0.3	7.47	7.15	0.24	-0.12	6.15	5.84	6.15	5.84	-6.5	-6.8	5.99	-6.7	12.2	0.3	6.4	5.68	0.59	-0.36	Zone8mm(Durchmesser)	521	522	-0.03	0.16	520	-0.42	-0.14	3.8	11.2	24.1	59.1	15	0.16	1.04	1	5.6
Healthy	35	1	Links	(25)3D-ScanHR	8.01	7.82	8.01	7.82	42.2	43.2	7.91	42.7	175.2	1	8.13	7.78	0.45	-0.24	6.92	6.65	6.92	6.65	-5.8	-6	6.78	-5.9	170.2	0.2	6.87	6.49	-0.12	0.03	Zone8mm(Durchmesser)	554	554	0.14	0.06	551	0.53	-0.68	4	11.5	24.3	58.3	19	0.2	1.01	1	5.7
Healthy	36	1	Links	(25)3D-ScanHR	7.27	7.13	7.27	7.13	46.4	47.3	7.2	46.9	177.8	0.9	7.4	7.01	0.38	-0.17	5.95	5.59	5.95	5.59	-6.7	-7.2	5.77	-6.9	0.9	0.4	6	5.32	0.11	-0.03	Zone8mm(Durchmesser)	584	585	-0.04	0.03	583	0.27	-0.27	4.2	12.5	27.5	70.5	15	0.12	1.03	1	4.7
Healthy	37	1	Rechts	(25)3D-ScanHR	7.89	7.77	7.89	7.77	42.8	43.4	7.83	43.1	13.6	0.7	7.96	7.63	0.24	-0.13	6.55	6.11	6.55	6.11	-6.1	-6.6	6.33	-6.3	179.2	0.4	6.64	5.92	0.44	-0.22	Zone8mm(Durchmesser)	532	530	-0.2	0.12	524	-1.17	0	3.9	11.4	24.5	60.1	19	0.25	1.06	1	10.4
MPS	11	1	Rechts	(25)3D-ScanHR	8.32	7.88	8.32	7.88	40.6	42.9	8.1	41.7	173.5	2.3	8.43	7.66	0.64	-0.43	6.94	6.03	6.94	6.03	-5.8	-6.6	6.49	-6.2	177.3	0.9	6.5	5.55	-0.14	0.05	Zone8mm(Durchmesser)	479	477	-0.59	-1.18	462	-1.51	-0.48	3.5	10.4	23	60	24	0.17	1.05	1.01	4.8
MPS	2	1	Links	(25)3D-ScanHR	8.6	8.32	8.6	8.32	39.2	40.6	8.46	39.9	161.6	1.4	8.76	8.03	0.37	-0.3	6.62	6.2	6.62	6.2	-6	-6.4	6.41	-6.2	159.9	0.4	6.57	4.94	-0.64	0.49	Zone8mm(Durchmesser)	576	576	-0.25	-0.4	569	0.67	-0.67	4.2	12.4	27.4	70.7	32	0.39	1.01	1	8.8
MPS	3	1	Links	(25)3D-ScanHR	8.47	7.77	8.47	7.77	39.8	43.4	8.12	41.6	2.3	3.6	8.58	7.41	0.66	-0.44	10.9	7.88	10.9	7.88	-3.7	-5.1	9.39	-4.3	24.1	1.4	23.8	5.53	-2.33	5.56	Zone8mm(Durchmesser)	807	795	0.53	-0.16	129	-0.07	-4.37	5.5	15.2	30	63.8	54	0.46	1.01	1.03	8
MPS	4	1	Rechts	(25)3D-ScanHR	7.66	7.4	7.66	7.4	44.1	45.6	7.53	44.8	8.2	1.6	7.81	7.25	0.56	-0.33	6.3	5.76	6.3	5.76	-6.3	-6.9	6.03	-6.6	15.1	0.6	6.36	5.71	0.47	-0.23	Zone8mm(Durchmesser)	409	405	-0.18	-0.15	400	-0.85	-0.15	3	9	20.2	53.4	20	0.19	1.04	1.01	5.8
MPS	5	1	Links	(25)3D-ScanHR	7.98	7.27	7.98	7.27	42.3	46.4	7.63	44.3	176.4	4.1	8.04	7	0.73	-0.61	6.7	5.62	6.7	5.62	-6	-7.1	6.16	-6.5	177.2	1.1	6.11	5.42	-0.18	0.08	Zone8mm(Durchmesser)	462	463	0.02	0.05	453	1.18	-0.22	3.4	10	22.5	61.9	46	0.44	1.01	1.04	8.4
MPS	8	1	Links	(25)3D-ScanHR	8.61	8.22	8.61	8.22	39.2	41.1	8.42	40.1	171.8	1.9	8.89	8.12	0.74	-0.59	7	6.63	7	6.63	-5.7	-6	6.81	-5.9	164.4	0.3	7.21	6.36	0.53	-0.32	Zone8mm(Durchmesser)	554	550	0.8	-0.27	549	0.68	-0.76	4	11.7	25	60.7	27	0.19	1.01	1.02	2.7
MPS	9	1	Links	(25)3D-ScanHR	7.83	7.63	7.83	7.63	43.1	44.2	7.73	43.7	149	1.1	8.07	7.6	0.54	-0.35	6.6	6.18	6.6	6.18	-6.1	-6.5	6.39	-6.3	174.4	0.4	6.51	5.99	-0.16	0.05	Zone8mm(Durchmesser)	482	481	0.46	-0.14	479	0.37	-0.59	3.5	10.3	22.4	57.7	30	0.32	1.04	1.01	3.4
MPS	10	1	Rechts	(25)3D-ScanHR	8.19	7.96	8.19	7.96	41.2	42.4	8.07	41.8	11.9	1.2	8.51	7.86	0.6	-0.4	7.11	6.79	7.11	6.79	-5.6	-5.9	6.95	-5.8	178.2	0.3	6.63	5.94	-0.69	0.5	Zone8mm(Durchmesser)	531	528	-0.33	-0.17	521	-1.43	0.16	3.8	11	23.7	60.2	24	0.21	1.07	1	7
MPS	12	1	Rechts	(25)3D-ScanHR	8.31	7.89	8.31	7.89	40.6	42.8	8.1	41.7	0.9	2.2	8.4	7.72	0.67	-0.46	6.92	6.07	6.92	6.07	-5.8	-6.6	6.49	-6.2	179.1	0.8	6.44	5.54	0.02	-0.02	Zone8mm(Durchmesser)	476	485	-0.3	-1.25	464	-1.37	-0.34	3.5	10.3	22.9	60	24	0.18	1.07	1.01	5.5
MPS	13	1	Rechts	(25)3D-ScanHR	7.5	7.27	7.5	7.27	45	46.4	7.38	45.7	41.4	1.4	7.76	7.03	0.71	-0.52	6.2	5.84	6.2	5.84	-6.5	-6.8	6.02	-6.6	20.8	0.4	6.26	5.55	0.3	-0.16	Zone8mm(Durchmesser)	526	521	-0.38	-0.21	515	-0.73	-0.87	3.8	11.3	24.8	63.6	28	0.18	1.06	1.03	0.8
MPS	15	1	Links	(25)3D-ScanHR	7.76	7.67	7.76	7.67	43.5	44	7.72	43.7	43.9	0.5	7.89	7.31	0.25	-0.12	6.18	5.72	6.18	5.72	-6.5	-7	5.95	-6.7	11.2	0.5	6.17	5.06	0.11	-0.02	Zone8mm(Durchmesser)	544	542	0.25	-0.16	541	0.4	-0.54	4	11.9	26.5	69.3	29	0.3	1.09	1.01	11.8
MPS	20	1	Rechts	(25)3D-ScanHR	9.84	7.54	9.84	7.54	34.3	44.8	8.69	38.8	175	10.5	9.37	7.17	0.51	-1.46	10.15	6.79	10.15	6.79	-3.9	-5.9	8.47	-4.7	140.5	1.9	7.75	5.32	-0.88	0.9	Zone8mm(Durchmesser)	1357	1377	0.71	1.69	639	-4.9	2.26	9.6	26.8	54.4	117.6	177	1.84	1.06	1.02	9.2
MPS	23	1	Rechts	(25)3D-ScanHR	8.86	8.42	8.42	8.86	38.1	40.1	8.64	39.1	84.4	2	8.82	7.91	0.13	-0.12	7.54	5.11	7.54	5.11	-5.3	-7.8	6.32	-6.3	154.1	2.5	-3.48	4.31	2.28	-9.06	Zone8mm(Durchmesser)	839	825	-0.25	-0.12	687	-3.21	1.02	6.2	18.2	37.8	84.9	44	0.43	0.97	0.98	8.8
MPS	27	1	Rechts	(25)3D-ScanHR	7.86	7.72	7.86	7.72	42.9	43.7	7.79	43.3	167.8	0.8	8.3	7.53	0.71	-0.55	6.64	6.23	6.64	6.23	-6	-6.4	6.44	-6.2	8.3	0.4	6.41	5.96	-0.02	0.02	Zone8mm(Durchmesser)	510	506	-0.17	-0.25	501	-0.9	-0.7	3.7	10.8	23.5	60.9	30	0.23	1.09	1.01	6.3
MPS	38	1	Links	(25)3D-ScanHR	7.64	7.28	7.64	7.28	44.2	46.4	7.46	45.2	176.1	2.2	7.73	7.19	0.6	-0.39	6.3	5.84	6.3	5.84	-6.4	-6.8	6.07	-6.6	169.5	0.5	6.35	5.61	0.03	-0.08	Zone8mm(Durchmesser)	538	537	0.15	0.01	532	0.67	-0.54	3.9	11.5	25	62.9	28	0.28	1.04	1.01	1.1
MPS	39	1	Rechts	(25)3D-ScanHR	8.47	8.33	8.47	8.33	39.9	40.5	8.4	40.2	167.4	0.7	9.02	8.15	0.65	-0.49	7.04	6.26	7.04	6.26	-5.7	-6.4	6.65	-6	173.5	0.7	6.39	5.51	-0.49	0.29	Zone8mm(Durchmesser)	562	556	-0.53	-0.14	553	-1.09	-0.22	4.1	12	26.5	71.1	47	0.4	1.01	1.01	15.7
MPS	43	1	Rechts	(25)3D-ScanHR	7.33	7.12	7.33	7.12	46.1	47.4	7.23	46.7	7.7	1.3	7.48	7.06	0.47	-0.23	6.25	5.83	6.25	5.83	-6.4	-6.9	6.04	-6.6	3.6	0.5	6.29	5.77	0.41	-0.2	Zone8mm(Durchmesser)	518	516	-0.22	-0.1	515	-0.77	-0.28	3.7	11	23.8	59.1	16	0.06	1.01	1	3.1
MPS	40	1	Rechts	(25)3D-ScanHR	8.32	7.68	8.32	7.68	40.6	43.9	8	42.2	175.7	3.3	8.55	7.57	0.67	-0.48	6.67	6.06	6.67	6.06	-6	-6.6	6.37	-6.3	147.9	0.6	6.67	5.76	0.33	-0.24	Zone8mm(Durchmesser)	505	493	-0.61	-0.18	489	-1.06	-0.64	3.7	10.9	23.9	60.9	45	0.28	1.04	1	12.1
MPS	41	1	Rechts	(25)3D-ScanHR	8.08	7.9	8.08	7.9	41.8	42.7	7.99	42.2	6.6	1	8.35	7.76	0.66	-0.47	6.94	6.13	6.94	6.13	-5.8	-6.5	6.53	-6.1	173.1	0.8	6.66	5.81	-0.14	0.08	Zone8mm(Durchmesser)	455	454	-0.28	0.14	452	-0.93	-0.14	3.3	9.8	21.6	56	23	0.24	1.06	1.02	7.7
MPS	42	1	Links	(25)3D-ScanHR	7.49	7.21	7.49	7.21	45	46.8	7.35	45.9	138.4	1.8	7.67	7.06	0.36	-0.27	5.99	5.58	5.99	5.58	-6.7	-7.2	5.78	-6.9	179.9	0.5	5.87	5.11	-0.23	0.11	Zone8mm(Durchmesser)	551	549	0.3	-0.08	548	0.49	-0.28	4	11.9	26.7	72.3	27	0.23	1.06	1	10.6
[truncated: 145 more columns]
